# Supplementary material for: ‘Workshops in healing’ for senior medical students: a 5-year overview and appraisal
Source: HighWire-hosted journal article supplement (doi:10.1136/medhum-2013-010438), 2014-01-28

## APPENDIX

In the case of the statue depicted in Figure 1, students are asked to carefully observe, and to handle the statue as it is passed around amongst them. Students are asked to take a moment to feel the statue, and to gain a sense of which features of the statue are particularly meaningful to them. Students are asked “what do these figures mean to you?” The statue can be utilized in either the first or the second workshop, depending on which theme is being highlighted at the time. In the first workshop, the statue is used to discuss how the healthcare professional’s “wounds” or “brokenness” can be relevant to supporting persons with life-threatening illness.

Typical comments from students include:

1. The heads of the figures are touching; they seem to be of one mind; they are in-tune with each other.
2. They seem to be two different people, made of the one piece of marble.
3. Seen from a particular angle, the two figures appear to be one, in complete unity; they look like one statue, not two figures.
4. The figures seem to be supporting each other, giving each other energy and strength.
5. They are the same height – one does not seem to be superior to the other.
6. Although they are broken, they are still able to connect with each other.

Students are asked how these interpretations are relevant to some of the clinical encounters that they have witnessed. They are also asked “what does the statue mean to you personally?”

FIGURE 1

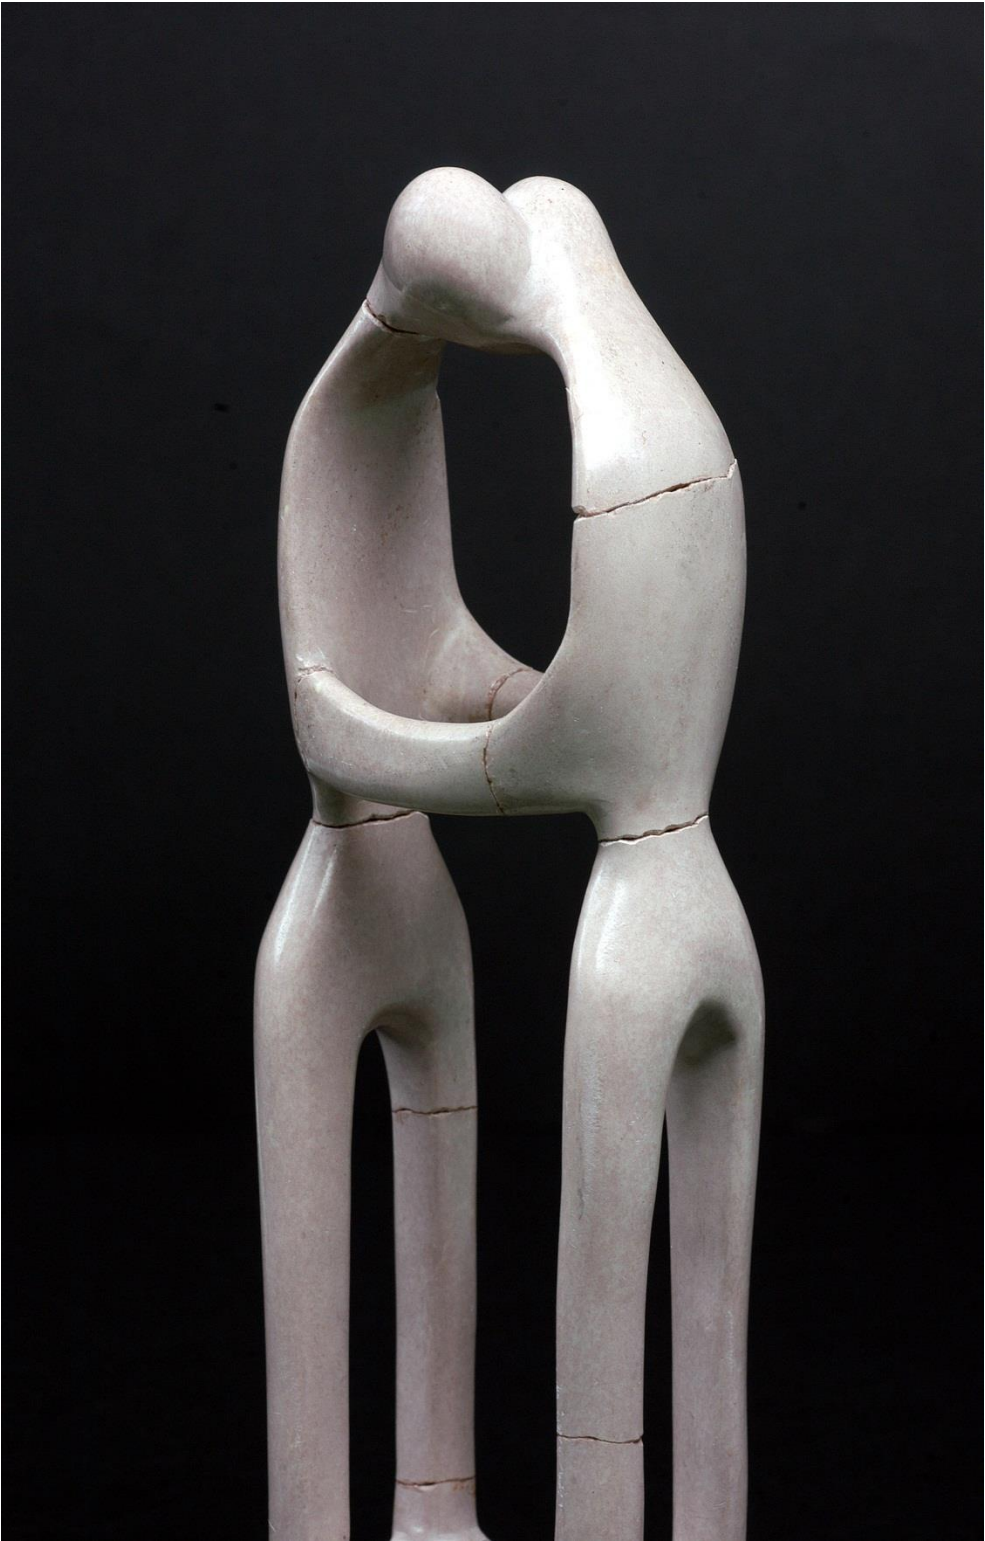

Supplement: medhum-2013-010438supp.pdf [file medhum-2013-010438supp.pdf]
